# Supplementary material for: Negative Acts in the Courtroom: Characteristics, Distribution, and Frequency among a National Cohort of Danish Prosecutors
Source: MDPI journal article supplement (doi:10.3390/bs14040332), 2024-04-16
Supplement: s1 [file s1]

Supplementary materials:

Geographical Region

Table S1 shows a statistically significant difference between the frequency of reported experiences with a lack of court management and discourtesy/dishonesty and the geographical area of employment. Prosecutors employed by the Eastern Danish Prosecution Service more frequently report experiencing illegitimate stressors due to a lack of court management compared to their colleagues in the Central and Western Danish Prosecution Services. Conversely, prosecutors employed by the Western Danish Prosecution Service report experiencing discourtesy/dishonesty more frequently than their colleagues in the Eastern and Central Danish Prosecution Services.

**Table S1.** Distribution of reported negative acts from professional counterparts across geographical areas of employment (the central, eastern, or western Prosecution Service) with  $p$ -values and adjusted standardized residuals from a  $\chi^2$  test of independence.

| Negative Acts                     | The Central Danish Prosecution Service |             |             | The Western Danish Prosecution Service |             |             | The Eastern Danish Prosecution Service |             |             | $\chi^2, p$                          |
|-----------------------------------|----------------------------------------|-------------|-------------|----------------------------------------|-------------|-------------|----------------------------------------|-------------|-------------|--------------------------------------|
|                                   | n                                      | %           | Adj. Std. R | n                                      | %           | Adj. Std. R | n                                      | %           | Adj. Std. R |                                      |
| <b>Illegitimate tasks *</b>       | <5                                     | NA          | −0.2        | <5                                     | NA          | −1.8        | 15                                     | 4.5         | 1.8         | 3.730, $p = 0.145$                   |
| Illegitimate stressor             |                                        |             |             |                                        |             |             |                                        |             |             |                                      |
| <b>Lack of court management *</b> | <5                                     | NA          | −0.8        | <5                                     | NA          | −3.4        | 25                                     | 7.5         | 3.8         | 15.507, $p < 0.001$                  |
| Exaggerated conflicts             | 9                                      | 9.0         | 1.6         | 11                                     | 4.5         | −0.9        | 18                                     | 5.4         | −0.2        | 2.780, $p = 0.249$                   |
| Illegitimate behavior             |                                        |             |             |                                        |             |             |                                        |             |             |                                      |
| Verbal abuse                      | 15                                     | 15.0        | −0.9        | 37                                     | 15.1        | −1.5        | 71                                     | 21.3        | 2.1         | 4.456, $p = 0.108$                   |
| General incivility                |                                        |             |             |                                        |             |             |                                        |             |             |                                      |
| <b>Discourtesy/dishonesty</b>     | <b>48</b>                              | <b>48.0</b> | <b>0.7</b>  | <b>126</b>                             | <b>51.4</b> | <b>2.5</b>  | <b>131</b>                             | <b>39.3</b> | <b>−2.9</b> | <b>8.766, <math>p = 0.012</math></b> |
| Ignoring/exclusion/silencing *    | 6                                      | 6.0         | 1.8         | 5                                      | 2.0         | −1.2        | 10                                     | 3.0         | −0.1        | 3.728, $p = 0.170$                   |
| Professional discrediting         | 19                                     | 19.0        | −0.4        | 50                                     | 20.4        | −0.1        | 71                                     | 21.3        | 0.4         | 0.266, $p = 0.875$                   |
| Threats/intimidation              | 7                                      | 7.0         | 0.1         | 15                                     | 6.1         | −0.5        | 24                                     | 7.2         | 0.4         | 0.271, $p = 0.873$                   |
| Person-focused incivility         |                                        |             |             |                                        |             |             |                                        |             |             |                                      |
| Gender/age disparagement          | <5                                     | NA          | −0.6        | 15                                     | 6.1         | 0.7         | 17                                     | 5.1         | −0.2        | 0.691, $p = 0.708$                   |
| Unprofessional address *          | <5                                     | NA          | 1.0         | <5                                     | NA          | −0.4        | <5                                     | NA          | −0.3        | 1.085, $p = 0.590$                   |
| Appearance comments *             | <5                                     | NA          | 0.8         | <5                                     | NA          | 0.1         | <5                                     | NA          | −0.7        | 0.803, $p = 0.493$                   |

Note: Adj. Std. R = adjusted standardized residuals; **bold** = values significant at  $p < 0.05$ ; \* =  $p$ -value from Fisher's exact test due to an expected cell count less than 5 ( $n < 5$ ), and the corresponding NA for percentage refers to censored counts to maintain anonymity.
